# Supplementary material for: Agreement between the laboratory-based and non-laboratory-based WHO cardiovascular risk charts: a cross-sectional analysis of a national health survey in Peru
Source: HighWire-hosted journal article supplement (doi:10.1136/bmjopen-2022-063289), 2022-11-01

**Agreement between the laboratory- and non-laboratory-based WHO cardiovascular risk charts:  
a cross-sectional analysis of a national health survey in Peru**

**Correspondence author:**

Rodrigo M Carrillo-Larco, MD

Department of Epidemiology and Biostatistics

School of Public Health

Imperial College London

rcarrill@ic.ac.uk

## Table of Contents

|                                                                                                                                                                                                                                                                    |    |
|--------------------------------------------------------------------------------------------------------------------------------------------------------------------------------------------------------------------------------------------------------------------|----|
| <i>Table of Contents</i> .....                                                                                                                                                                                                                                     | 2  |
| <i>Supplementary Figure 1. Formula to compute the survey sample size</i> .....                                                                                                                                                                                     | 3  |
| <i>Supplementary Figure 2. Flowchart of data cleaning and inclusion criteria</i> .....                                                                                                                                                                             | 3  |
| <i>Supplementary Table 1. Summary statistics of the first and second systolic blood pressure (SBP) records in the overall sample</i> .....                                                                                                                         | 4  |
| <i>Supplementary Table 2. Sensitivity Analysis: Lin's concordance coefficient correlation showing agreement between laboratory and non-laboratory-based risk models according to the predictors in the 2019 WHO CVD risk models and urban/rural location</i> ..... | 4  |
| <i>Supplementary Table 3. Kappa statistics showing agreement between laboratory and non-laboratory-based risk scores in the overall sample</i> .....                                                                                                               | 5  |
| <i>Supplementary Table 4. Kappa statistics showing agreement between laboratory and non-laboratory-based risk scores by sex</i> .....                                                                                                                              | 5  |
| <i>Supplementary Table 5. Kappa statistics showing agreement between laboratory and non-laboratory-based risk scores by age groups</i> .....                                                                                                                       | 5  |
| <i>Supplementary Table 6. Kappa statistics showing agreement between laboratory and non-laboratory-based risk scores by body mass index categories</i> .....                                                                                                       | 6  |
| <i>Supplementary Table 7. Kappa statistics showing agreement between laboratory and non-laboratory-based risk scores by smoking status</i> .....                                                                                                                   | 6  |
| <i>Supplementary Table 8. Kappa statistics showing agreement between laboratory and non-laboratory-based risk scores by diabetes status</i> .....                                                                                                                  | 6  |
| <i>Supplementary Table 9. Kappa statistics showing agreement between laboratory and non-laboratory-based risk scores by urban/rural location</i> .....                                                                                                             | 7  |
| <i>Supplementary Figure 3. Sensitivity Analysis: Bland Altman plots showing agreement between laboratory and non-laboratory-based risk scores according to sex</i> .....                                                                                           | 7  |
| <i>Supplementary Figure 4. Sensitivity Analysis: Bland Altman plots showing agreement between laboratory and non-laboratory-based risk scores according to age groups</i> .....                                                                                    | 8  |
| <i>Supplementary Figure 5. Sensitivity Analysis: Bland Altman plots showing agreement between laboratory and non-laboratory-based risk scores according to body mass index categories</i> .....                                                                    | 9  |
| <i>Supplementary Figure 6. Sensitivity Analysis: Bland Altman plots showing agreement between laboratory and non-laboratory-based risk scores according to smoking status</i> .....                                                                                | 10 |
| <i>Supplementary Figure 7. Sensitivity Analysis: Bland Altman plots showing agreement between laboratory and non-laboratory-based risk scores according to self-reported diabetes status</i> .....                                                                 | 11 |

**Supplementary Figure 1. Formula to compute the survey sample size**

$$n_h = \frac{N_h Z^2 P_h Q_h}{(N_h - 1)d^2 + Z^2 P_h Q_h} * TNR$$

Where:

$N_h$ : number of people within an age group in the “h” conglomerate

$n_h$ : number of people in the sample within an age group in the “h” conglomerate

d: error margin assumed in the estimation of  $P_h$

Z: 95% confidence level

TNR (*Tasa de No Respuesta* in Spanish): Expected refusal rate

$P_h$ : prevalence of overweight in adults in the “h” conglomerate

**Supplementary Figure 2. Flowchart of data cleaning and inclusion criteria**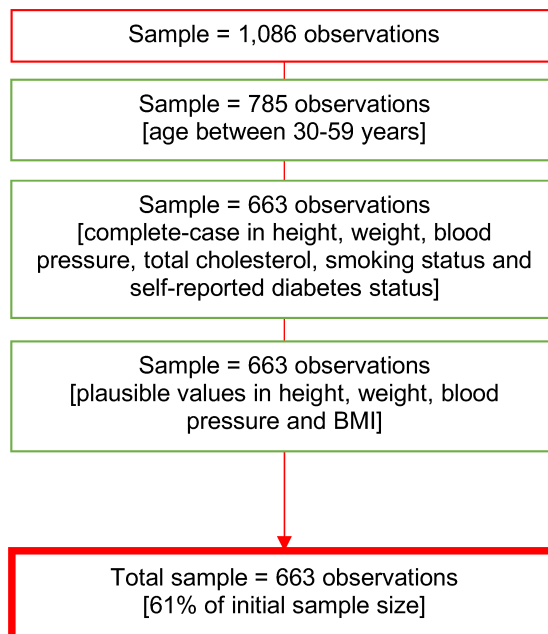

**Supplementary Table 1. Summary statistics of the first and second systolic blood pressure (SBP) records in the overall sample**

|               | First SBP record | Second SBP record |
|---------------|------------------|-------------------|
| Minimum value | 78               | 75                |
| 1st quartile  | 101              | 99                |
| Median        | 109              | 108               |
| Mean          | 110.33           | 109.54            |
| 3rd quartile  | 118              | 118               |
| Maximum value | 203              | 198               |

**Supplementary Table 2. Sensitivity Analysis: Lin's concordance coefficient correlation showing agreement between laboratory and non-laboratory-based risk models according to the predictors in the 2019 WHO CVD risk models and urban/rural location**

| Variables                | Categories                      | Lin's concordance coefficient correlation (95% CI) |
|--------------------------|---------------------------------|----------------------------------------------------|
| Sex                      | Men                             | 0.87 (0.84 - 0.89)                                 |
| Sex                      | Women                           | 0.85 (0.83 - 0.87)                                 |
| Age (years)              | 30-39                           | 0.87 (0.84 - 0.9)                                  |
| Age (years)              | 40-49                           | 0.74 (0.68 - 0.79)                                 |
| Age (years)              | 50-59                           | 0.83 (0.78 - 0.87)                                 |
| Body mass index category | Normal                          | 0.9 (0.87 - 0.92)                                  |
| Body mass index category | Overweight                      | 0.87 (0.85 - 0.9)                                  |
| Body mass index category | Obese                           | 0.86 (0.82 - 0.89)                                 |
| Smoking status           | Smoker                          | 0.82 (0.73 - 0.88)                                 |
| Smoking status           | Non-smoker                      | 0.86 (0.84 - 0.88)                                 |
| Diabetes status          | With self-reported diabetes     | 0.74 (0.63 - 0.82)                                 |
| Diabetes status          | Not with self-reported diabetes | 0.91 (0.9 - 0.92)                                  |
| Urban or rural           | Urban                           | 0.88 (0.86 - 0.9)                                  |
| Urban or rural           | Rural                           | 0.86 (0.82 - 0.88)                                 |

**Supplementary Table 3. Kappa statistics showing agreement between laboratory and non-laboratory-based risk scores in the overall sample**

| Laboratory-based-risk category | Non-laboratory-based-risk category |     |       | kappa |
|--------------------------------|------------------------------------|-----|-------|-------|
|                                | 0-5                                | 5-9 | 10-19 |       |
| 0-5                            | 618                                | 4   | 0     | 0.62  |
| 5-9                            | 17                                 | 19  | 1     |       |
| 10-19                          | 0                                  | 3   | 1     |       |

**Supplementary Table 4. Kappa statistics showing agreement between laboratory and non-laboratory-based risk scores by sex**

| Laboratory-based-risk category | Sex   | Non-laboratory-based-risk category |     |       | kappa |
|--------------------------------|-------|------------------------------------|-----|-------|-------|
|                                |       | 0-5                                | 5-9 | 10-19 |       |
| 0-5                            | Men   | 251                                | 4   | 0     | 0.7   |
| 5-9                            | Men   | 7                                  | 15  | 1     |       |
| 10-19                          | Men   | 0                                  | 1   | 1     |       |
| 0-5                            | Women | 367                                | 0   | 0     | 0.44  |
| 5-9                            | Women | 10                                 | 4   | 0     |       |
| 10-19                          | Women | 0                                  | 2   | 0     |       |

**Supplementary Table 5. Kappa statistics showing agreement between laboratory and non-laboratory-based risk scores by age groups**

| Laboratory-based-risk category | Age group | Non-laboratory-based-risk category |     |       | kappa |
|--------------------------------|-----------|------------------------------------|-----|-------|-------|
|                                |           | 0-5                                | 5-9 | 10-19 |       |
| 0-5                            | 30-39     | 236                                | 0   | 0     | 0     |
| 5-9                            | 30-39     | 1                                  | 0   | 0     |       |
| 10-19                          | 30-39     | 0                                  | 0   | 0     |       |
| 0-5                            | 40-49     | 216                                | 1   | 0     | 0.45  |
| 5-9                            | 40-49     | 4                                  | 2   | 1     |       |
| 10-19                          | 40-49     | 0                                  | 1   | 0     |       |
| 0-5                            | 50-59     | 166                                | 3   | 0     | 0.65  |
| 5-9                            | 50-59     | 12                                 | 17  | 0     |       |
| 10-19                          | 50-59     | 0                                  | 2   | 1     |       |

**Supplementary Table 6. Kappa statistics showing agreement between laboratory and non-laboratory-based risk scores by body mass index categories**

| Laboratory-based-risk category | Body mass index category | Non-laboratory-based-risk category |     |       | kappa |
|--------------------------------|--------------------------|------------------------------------|-----|-------|-------|
|                                |                          | 0-5                                | 5-9 | 10-19 |       |
| 0-5                            | Normal                   | 161                                | 1   | 0     | 0.66  |
| 5-9                            | Normal                   | 1                                  | 2   | 0     |       |
| 10-19                          | Normal                   | 0                                  | 0   | 0     |       |
| 0-5                            | Obese                    | 202                                | 3   | 0     | 0.65  |
| 5-9                            | Obese                    | 7                                  | 11  | 1     |       |
| 10-19                          | Obese                    | 0                                  | 2   | 1     |       |
| 0-5                            | Overweight               | 255                                | 0   | 0     | 0.55  |
| 5-9                            | Overweight               | 9                                  | 6   | 0     |       |
| 10-19                          | Overweight               | 0                                  | 1   | 0     |       |

**Supplementary Table 7. Kappa statistics showing agreement between laboratory and non-laboratory-based risk scores by smoking status**

| Laboratory-based-risk category | Smoking status | Non-laboratory-based-risk category |     |       | kappa |
|--------------------------------|----------------|------------------------------------|-----|-------|-------|
|                                |                | 0-5                                | 5-9 | 10-19 |       |
| 0-5                            | Non-smoker     | 568                                | 3   | 0     | 0.53  |
| 5-9                            | Non-smoker     | 12                                 | 9   | 0     |       |
| 10-19                          | Non-smoker     | 0                                  | 1   | 0     |       |
| 0-5                            | Smoker         | 50                                 | 1   | 0     | 0.67  |
| 5-9                            | Smoker         | 5                                  | 10  | 1     |       |
| 10-19                          | Smoker         | 0                                  | 2   | 1     |       |

**Supplementary Table 8. Kappa statistics showing agreement between laboratory and non-laboratory-based risk scores by diabetes status**

| Laboratory-based-risk category | Diabetes status                 | Non-laboratory-based-risk category |     |       | kappa |
|--------------------------------|---------------------------------|------------------------------------|-----|-------|-------|
|                                |                                 | 0-5                                | 5-9 | 10-19 |       |
| 0-5                            | Not with self-reported diabetes | 592                                | 4   | 0     | 0.71  |
| 5-9                            | Not with self-reported diabetes | 7                                  | 15  | 1     |       |
| 10-19                          | Not with self-reported diabetes | 0                                  | 0   | 0     |       |
| 0-5                            | With self-reported diabetes     | 26                                 | 0   | 0     | 0.36  |
| 5-9                            | With self-reported diabetes     | 10                                 | 4   | 0     |       |
| 10-19                          | With self-reported diabetes     | 0                                  | 3   | 1     |       |

**Supplementary Table 9. Kappa statistics showing agreement between laboratory and non-laboratory-based risk scores by urban/rural location**

| Laboratory-based-risk category | Urban/Rural | Non-laboratory-based-risk category |     |       | kappa |
|--------------------------------|-------------|------------------------------------|-----|-------|-------|
|                                |             | 0-5                                | 5-9 | 10-19 |       |
| 0-5                            | Rural       | 224                                | 1   | 0     | 0.53  |
| 5-9                            | Rural       | 4                                  | 3   | 0     |       |
| 10-19                          | Rural       | 0                                  | 1   | 0     |       |
| 0-5                            | Urban       | 394                                | 3   | 0     | 0.64  |
| 5-9                            | Urban       | 13                                 | 16  | 1     |       |
| 10-19                          | Urban       | 0                                  | 2   | 1     |       |

**Supplementary Figure 3. Sensitivity Analysis: Bland Altman plots showing agreement between laboratory and non-laboratory-based risk scores according to sex.**

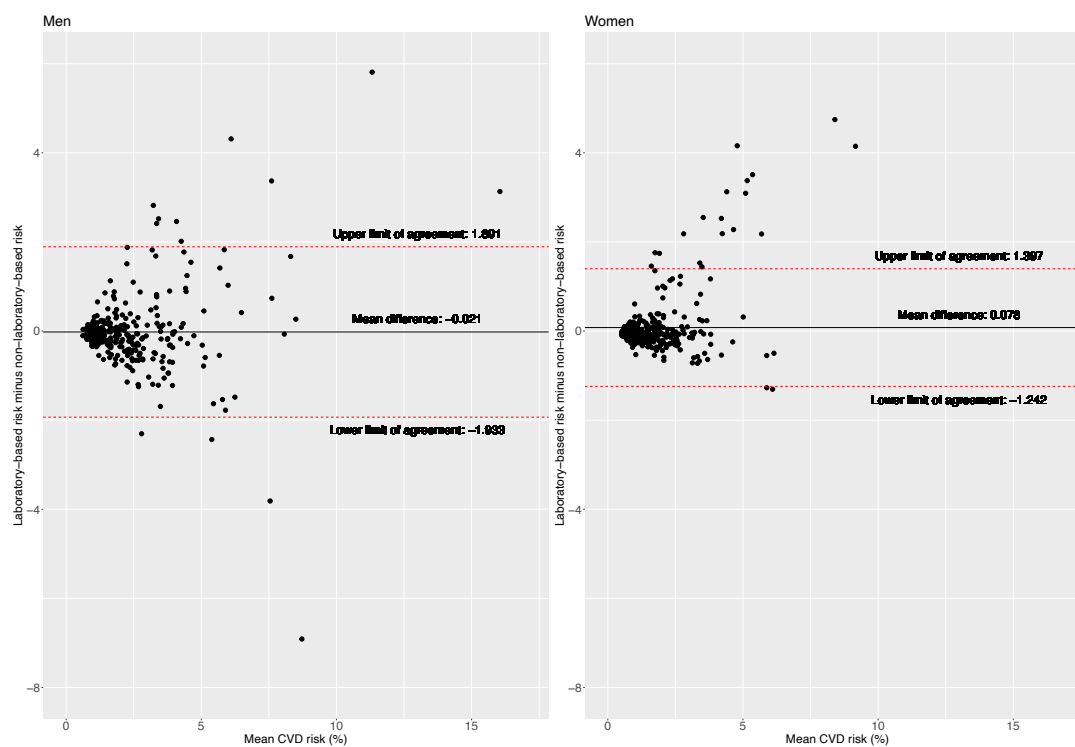

**Supplementary Figure 4. Sensitivity Analysis: Bland Altman plots showing agreement between laboratory and non-laboratory-based risk scores according to age groups.**



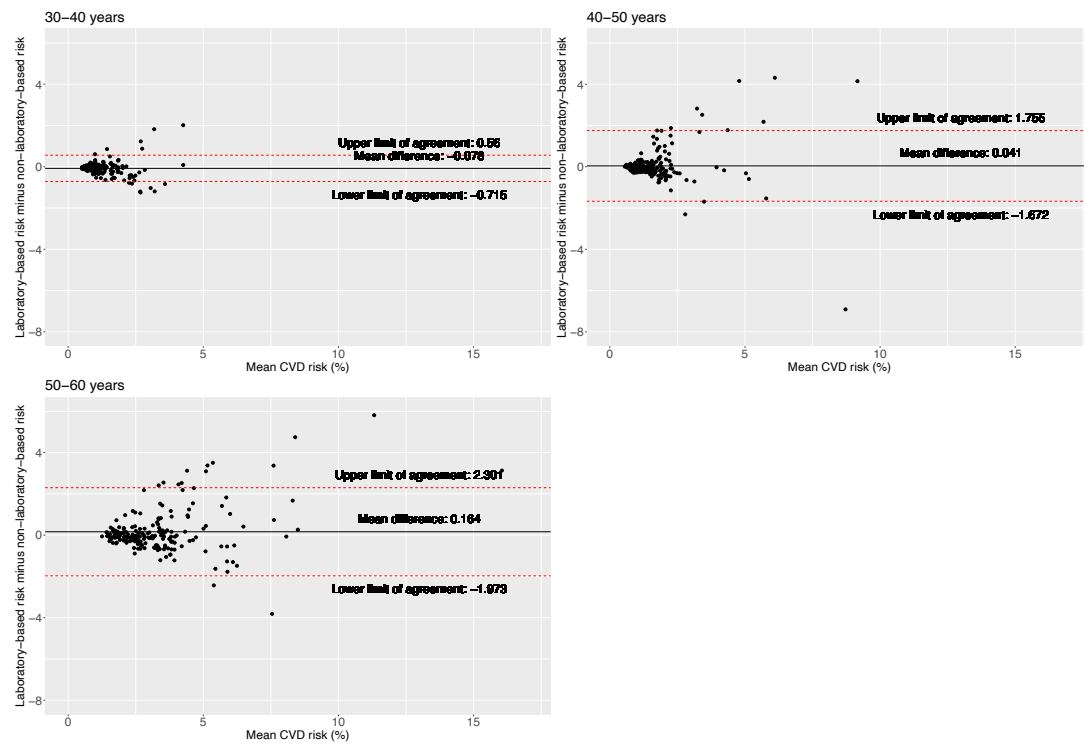

**Supplementary Figure 5. Sensitivity Analysis: Bland Altman plots showing agreement between laboratory and non-laboratory-based risk scores according to body mass index categories.**

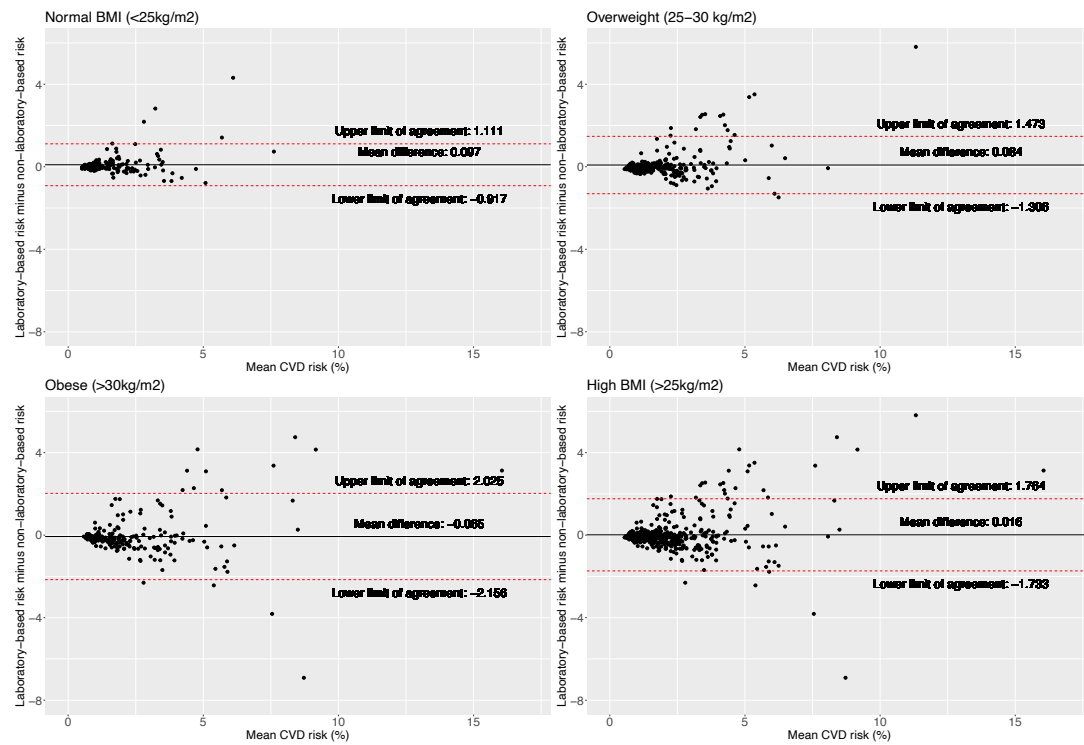

**Supplementary Figure 6. Sensitivity Analysis: Bland Altman plots showing agreement between laboratory and non-laboratory-based risk scores according to smoking status.**

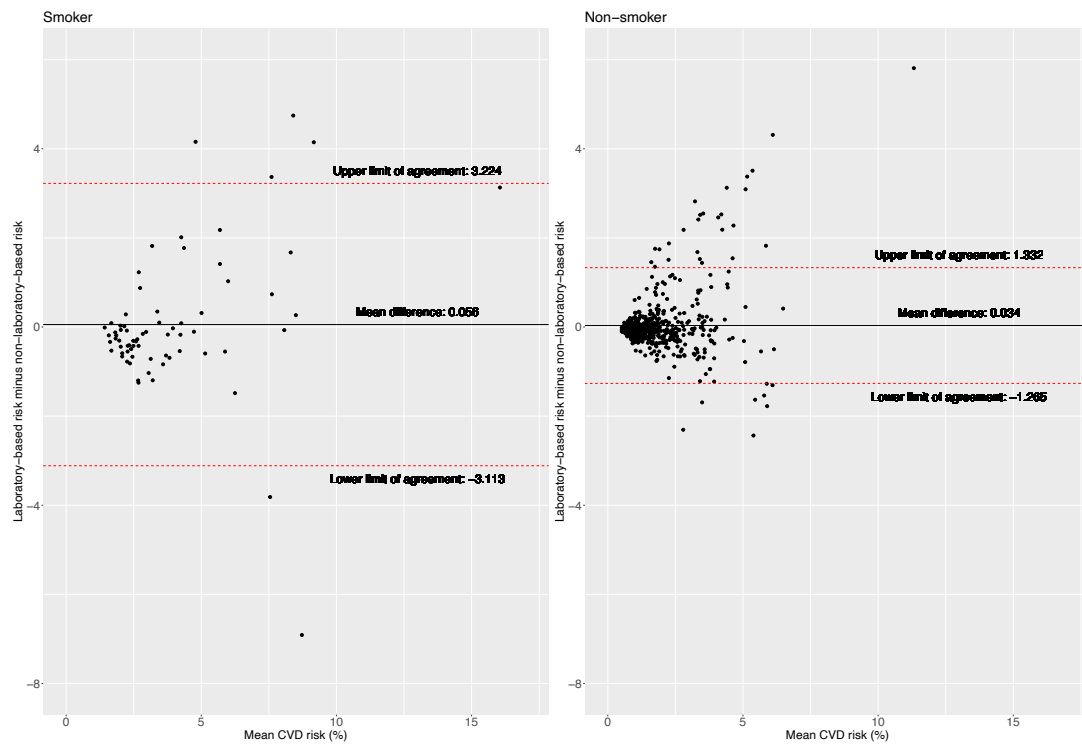

**Supplementary Figure 7. Sensitivity Analysis: Bland Altman plots showing agreement between laboratory and non-laboratory-based risk scores according to self-reported diabetes status.**

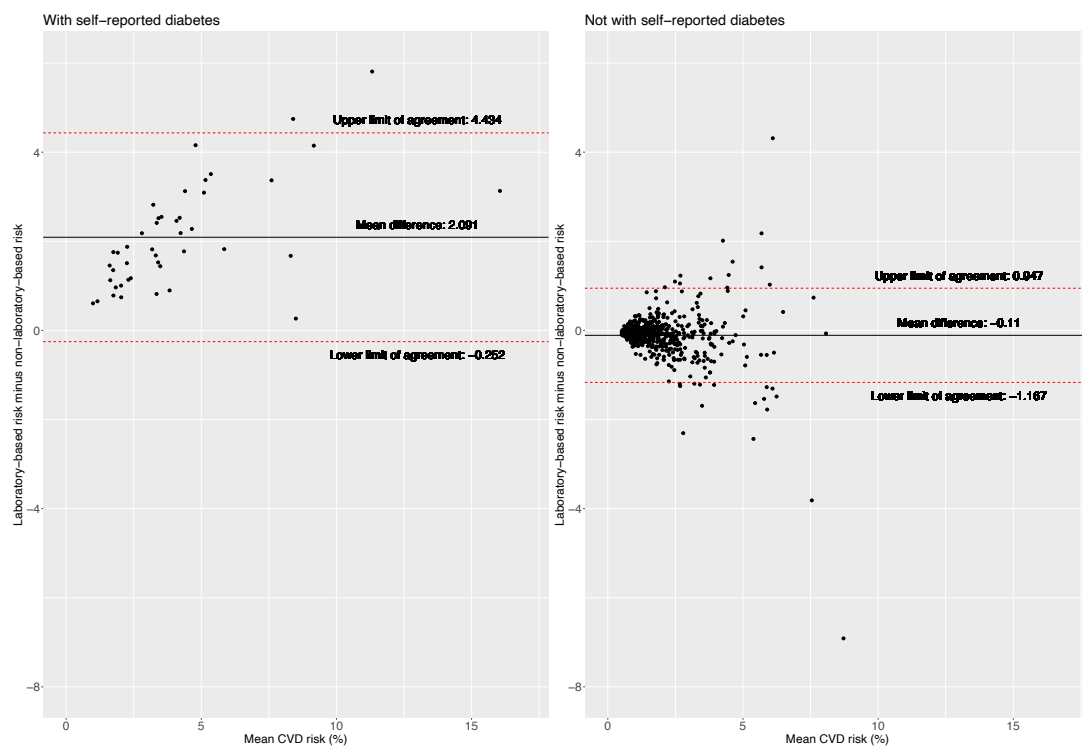

Supplement: bmjopen-2022-063289supp001_data_supplement.pdf [file bmjopen-2022-063289supp001_data_supplement.pdf]
